# Supplementary material
Source: publisher site journal article supplement (https://www.dovepress.com/article/439709)
Supplement: Supplementary file 1 [file get_supplementary_file.php]

| Table S1. List of analysed glycan probes and their sequences | |
| --- | --- |
| **CIG Array sets 1,2,3** | |
| **Probe** | **Structure** |
| Orsay-1-AO | Galβ-4GlcNAcβ-6Gal-AO |
| Orsay-2-AO | Galβ-4GlcNAcβ-3Gal-AO |
| Orsay-3-AO | Galβ-3GlcNAcβ-6Gal-AO |
| Orsay-4-AO | Galβ-3GlcNAcβ-3Gal-AO |
| DLNN | GlcNAcβ-3Galβ-4Glc-DH |
| GalNAcα-3Galβ-4Glc | GalNAcα-3Galβ-4Glc-DH |
| LNT | Galβ-3GlcNAcβ-3Galβ-4Glc-DH |
| LNnT | Galβ-4GlcNAcβ-3Galβ-4Glc-DH |
| B-like pentaosylceramide | Galα-3Galβ-4GlcNAcβ-3Galβ-4Glcβ-Cer |
| Klaus glycolipid | Galβ-3Galβ-4GlcNAcβ-3Galβ-4Glcβ-Cer |
| LSTa | NeuAcα-3Galβ-3GlcNAcβ-3Galβ-4Glc-DH |
| LSTc | NeuAcα-6Galβ-4GlcNAcβ-3Galβ-4Glc-DH |
| LSTd | NeuAcα-3Galβ-4GlcNAcβ-3Galβ-4Glc-DH |
| GSC-915-5 | GlcNAcβ-6Galβ-4GlcNAcβ-3Galβ-4Glc-DH |
| pLNH | Galβ-3GlcNAcβ-3Galβ-4GlcNAcβ-3Galβ-4Glc-DH |
| pLNnH | Galβ-4GlcNAcβ-3Galβ-4GlcNAcβ-3Galβ-4Glc-DH |
| GSC-915-4 | Galβ-4GlcNAcβ-6Galβ-4GlcNAcβ-3Galβ-4Glc-DH |
| GSC-915-4 (new) | Galβ-4GlcNAcβ-6Galβ-4GlcNAcβ-3Galβ-4Glc-DH |
| pLNH-b | Galβ-3GlcNAcβ-3Galβ-3GlcNAcβ-3Galβ-4Glc-DH |
| LNnO | Galβ-4GlcNAcβ-3Galβ-4GlcNAcβ-3Galβ-4GlcNAcβ-3Galβ-4Glc-DH |
| NeuAcα-(3')LNnO | NeuAcα-3Galβ-4GlcNAcβ-3Galβ-4GlcNAcβ-3Galβ-4GlcNAcβ-3Galβ-4Glc-DH |
| NeuAcα-(6')LNnO (F1) | NeuAcα-6Galβ-4GlcNAcβ-3Galβ-4GlcNAcβ-3Galβ-4GlcNAcβ-3Galβ-4Glc-DH  (position of NeuAc not fully defined) |
| NeuAcα-(6')LNnO (F2) | NeuAcα-6Galβ-4GlcNAcβ-3Galβ-4GlcNAcβ-3Galβ-4GlcNAcβ-3Galβ-4Glc-DH  (with internal 6-linked NeuAc, position not fully defined) |
| pHGGs | polar human granulocyte gangliosides |
| Lam-4-AO | Glcβ-3Glcβ-3Glcβ-3Glc-AO |
| Pust-4-AO | Glcβ-6Glcβ-6Glcβ-6Glc-AO |
| GM4 | NeuAcα-3Galβ-Cer |
| GM3 | NeuAcα-3Galβ-4Glcβ-Cer |
| GM3(Gc) | NeuGcα-3Galβ-4Glcβ-Cer |
| NeuGcα-(3')LN | NeuGcα-3Galβ-4GlcNAc-DH |
| GD3-tetra | NeuAcα-8NeuAcα-3Galβ-4Glc-DH |
| GD3 | NeuAcα-8NeuAcα-3Galβ-4Glcβ-Cer |
| GM1b-DH | NeuAcα-3Galβ-3GalNAcβ-4Galβ-4Glc-DH |
| Asialo-GM2 | GalNAcβ-4Galβ-4Glcβ-Cer |
| Asialo-GM1-Tetra | Galβ-3GalNAcβ-4Galβ-4Glc-DH |
| GM2 | GalNAcβ-4Galβ-4Glcβ-Cer  │  NeuAcα-3 |
| LSTb | Galβ-3GlcNAcβ-3Galβ-4Glc-DH  │ NeuAcα-6 |
| GM1-penta | Galβ-3GalNAcβ-4Galβ-4Glc-DH  │  NeuAcα-3 |
| GM1(Gc)-penta | Galβ-3GalNAcβ-4Galβ-4Glc-DH  │  NeuGcα-3 |
| GD2 | GalNAcβ-4Galβ-4Glcβ-Cer  │ NeuAcα-8NeuAcα-3 |
| GD1a | NeuAcα-3Galβ-3GalNAcβ-4Galβ-4Glcβ-Cer  │  NeuAcα-3 |
| GD1a-hexa | NeuAcα-3Galβ-3GalNAcβ-4Galβ-4Glc-DH  │  NeuAcα-3 |
| GD1b-DH | Galβ-3GalNAcβ-4Galβ-4Glc-DH  │ NeuAcα-8NeuAcα-3 |
| GT1c-DH | Galβ-3GalNAcβ-4Galβ-4Glc-DH  │ NeuAcα-8NeuAcα-8NeuAcα-3 |
| GD1b | Galβ-3GalNAcβ-4Galβ-4Glcβ-Cer  │ NeuAcα-8NeuAcα-3 |
| GT1a | NeuAcα-8NeuAcα-3Galβ-3GalNAcβ-4Galβ-4Glcβ-Cer  │  NeuAcα-3 |
| GT1b | NeuAcα-3Galβ-3GalNAcβ-4Galβ-4Glcβ-Cer  │  NeuAcα-8NeuAcα-3 |
| GQ1b | NeuAcα-8NeuAcα-3Galβ-3GalNAcβ-4Galβ-4Glcβ-Cer  │  NeuAcα-8NeuAcα-3 |
| O1-AO | GlcNAcβ-6  │  Gal-AO  │ GlcNAcβ-3 |
| Orsay-5-AO | GlcNAcβ-6  │  Gal-AO  │ Galβ-3GlcNAcβ-3 |
| Orsay-6-AO | Galβ-4GlcNAcβ-6  │  Gal-AO  │ Galβ-3GlcNAcβ-3 |
| Orsay-7-AO | Galβ-4GlcNAcβ-6  │  Gal-AO  │ Galβ-4GlcNAcβ-3 |
| LNH | Galβ-4GlcNAcβ-6  │  Galβ-4Glc-DH  │ Galβ-3GlcNAcβ-3 |
| LNnH | Galβ-4GlcNAcβ-6  │  Galβ-4Glc-DH  │ Galβ-4GlcNAcβ-3 |
| MSLNH | NeuAcα-6Galβ-4GlcNAcβ-6  │  Galβ-4Glc-DH  │  Galβ-3GlcNAcβ-3 |
| MSLNnH-I | Galβ-4GlcNAcβ-6  │  Galβ-4Glc-DH  │ NeuAcα-6Galβ-3GlcNAcβ-3 |
| DSLNnH | NeuAcα-6Galβ-4GlcNAcβ-6  │  Galβ-4Glc-DH  │ NeuAcα-6Galβ-4GlcNAcβ-3 |
| iLNO | Galβ-3GlcNAcβ-3Galβ-4GlcNAcβ-6  │  Galβ-4Glc-DH  │  Galβ-3GlcNAcβ-3 |
| LND | Galβ-4GlcNAcβ-6  │  Galβ-4GlcNAcβ-6  │ │ Galβ-3GlcNAcβ-3 Galβ-4Glc-DH  │  Galβ-3GlcNAcβ-3 |
| Nonaosylceramide | GlcNAcβ-6  │ GlcNAcβ-6 Galβ-4GlcNAcβ-3Galβ-4Glcβ-Cer  │ │  Galβ-4GlcNAcβ-3  │ GlcNAcβ-3 |
| I-octaosylceramide | Galβ-4GlcNAcβ-6  │  Galβ-4GlcNAcβ-3Galβ-4Glcβ-Cer  │ Galβ-4GlcNAcβ-3 |
| I-dodecaosylceramide | Galβ-4GlcNAcβ-6  │ Galβ-4GlcNAcβ-6 Galβ-4GlcNAcβ-3Galβ-4Glcβ-Cer  │ │  Galβ-4GlcNAcβ-3  │ Galβ-4GlcNAcβ-3 |
| B-like pentadecaosylceramide | Galα-3Galβ-4GlcNAcβ-6  │ Galα-3Galβ-4GlcNAcβ-6 Galβ-4GlcNAcβ-3Galβ-4Glcβ-Cer  │ │  Galβ-4GlcNAcβ-3  │ Galα-3Galβ-4GlcNAcβ-3 |
| B-like decaosylceramide | Galα-3Galβ-4GlcNAcβ-6  │  Galβ-4GlcNAcβ-3Galβ-4Glcβ-Cer  │ Galα-3Galβ-4GlcNAcβ-3 |
| Lea-Tri | Galβ-3GlcNAc-DH  │  Fucα-4 |
| Lex-Tri | Galβ-4GlcNAc-DH  │  Fucα-3 |
| Lex-Tri-AO | Galβ-4GlcNAc-AO  │  Fucα-3 |
| LNFP-II | Galβ-3GlcNAcβ-3Galβ-4Glc-DH  │  Fucα-4 |
| LNDFH-II | Galβ-3GlcNAcβ-3Galβ-4Glc-DH  │ │  Fucα-4 Fucα-3 |
| Leb-hexaosylceramide | Fucα-2Galβ-3GlcNAcβ-3Galβ-4Glcβ-Cer  │  Fucα-4 |
| LNDFH-I | Fucα-2Galβ-3GlcNAcβ-3Galβ-4Glc-DH  │  Fucα-4 |
| LNTFH-I | Fucα-2Galβ-3GlcNAcβ-3Galβ-4Glc-DH  │ │  Fucα-4 Fucα-2 |
| LNFP-III | Galβ-4GlcNAcβ-3Galβ-4Glc-DH  │  Fucα-3 |
| LNnDFH-I | Fucα-2Galβ-4GlcNAcβ-3Galβ-4Glc-DH  │  Fucα-3 |
| LNnDFH-II | Galβ-4GlcNAcβ-3Galβ-4Glc-DH  │ │  Fucα-3 Fucα-3 |
| LNnDFH-V | Galβ-4GlcNAcβ-3Galβ-4Glc-DH  │ │  Fucα-3 Fucα-2 |
| LNnTFH-I | Fucα-2Galβ-4GlcNAcβ-3Galβ-4Glc-DH  │ │  Fucα-3 Fucα-2 |
| pLNFH-IV | Galβ-3GlcNAcβ-3Galβ-4GlcNAcβ-3Galβ-4Glc-DH  │  Fucα-3 |
| DFpLNH-II | Galβ-3GlcNAcβ-3Galβ-4GlcNAcβ-3Galβ-4Glc-DH  │ │  Fucα-4 Fucα-3 |
| TFpLNH-I | Fucα-2Galβ-3GlcNAcβ-3Galβ-4GlcNAcβ-3Galβ-4Glc-DH  │ │  Fucα-4 Fucα-3 |
| MFLNH-III | Galβ-4GlcNAcβ-6  │ │  Fucα-3 Galβ-4Glc-DH  │ Galβ-3GlcNAcβ-3 |
| DFLNH(b) | Galβ-4GlcNAcβ-6  │ │  Fucα-3 Galβ-4Glc-DH  │ Galβ-3GlcNAcβ-3  │  Fucα-4 |
| DFLNH(c) | Galβ-4GlcNAcβ-6  │  Galβ-4Glc-DH  │ Fucα-2Galβ-3GlcNAcβ-3  │  Fucα-4 |
| DFLNH(a) | Galβ-4GlcNAcβ-6  │ │  Fucα-3 Galβ-4Glc-DH  │ Fucα-2Galβ-3GlcNAcβ-3 |
| TFLNH | Galβ-4GlcNAcβ-6   │ │   Fucα-3 Galβ-4Glc-DH  │  Fucα-2Galβ-3GlcNAcβ-3   │   Fucα-4 |
| MFLNnH(a) | Galβ-4GlcNAcβ-6  │ │  Fucα-3 Galβ-4Glc-DH  │ Galβ-4GlcNAcβ-3 |
| DFLNnH | Galβ-4GlcNAcβ-6  │ │  Fucα-3 Galβ-4Glc-DH  │ Galβ-4GlcNAcβ-3  │  Fucα-3 |
| MSDFLNnH-AO | Fucα-2Galβ-4GlcNAcβ-6   │ │  Fucα-3 Galβ-4Glc-AO  │  NeuAcα-6Galβ-4GlcNAcβ-3 |
| MFiLNO-IV | Galβ-3GlcNAcβ-3Galβ-4GlcNAcβ-6  │ │  Fucα-3 Galβ-4Glc-DH  │  Galβ-3GlcNAcβ-3 |
| DFiLNO | Galβ-3GlcNAcβ-3Galβ-4GlcNAcβ-6  │ │  Fucα-3 Galβ-4Glc-DH  │  Fucα-2Galβ-3GlcNAcβ-3 |
| TFiLNO | Galβ-3GlcNAcβ-3Galβ-4GlcNAcβ-6  │ │ │  Fucα-4 Fucα-3 Galβ-4Glc-DH  │  Galβ-3GlcNAcβ-3  │  Fucα-4 |
| TFiLNO(1-2,2,3) | Fucα-2Galβ-3GlcNAcβ-3Galβ-4GlcNAcβ-6  │ │  Fucα-3 Galβ-4Glc-DH  │  Fucα-2Galβ-3GlcNAcβ-3 |
| MFLND | Galβ-4GlcNAcβ-6  │ │  Fucα-3 Galβ-4GlcNAcβ-6  │ │ Galβ-3GlcNAcβ-3 Galβ-4Glc-DH  │  Galβ-3GlcNAcβ-3 |
| H-Di | Fucα-2Gal-DH |
| H-Tri-T2-AO | Fucα-2Galβ-4GlcNAc-AO |
| LNFP-I | Fucα-2Galβ-3GlcNAcβ-3Galβ-4Glc-DH |
| LNnFP-I | Fucα-2Galβ-4GlcNAcβ-3Galβ-4Glc-DH |
| H2 (with H2+Fuc)* | Fucα-2Galβ-4GlcNAcβ-3Galβ-4GlcNAcβ-3Galβ-4Glcβ-Cer |
| GSC-915-3 | Fucα-2Galβ-4GlcNAcβ-6Galβ-4GlcNAcβ-3Galβ-4Glc-DH |
| MFLNH-I | Galβ-4GlcNAcβ-6   │   Galβ-4Glc-DH  │  Fucα-2Galβ-3GlcNAcβ-3 |
| PSM-F1H2HN3-OY | Fucα-2Galβ-4GlcNAcβ-6   │   Galβ-4GlcNAcβ-OY   │   GlcNAcβ-3 |
| GSC-915-2 | Fucα-2Galβ-4GlcNAcβ-6   │   Galβ-4GlcNAcβ-3Galβ-4Glc-DH  │   GlcNAcβ-3 |
| GSC-915 | Fucα-2Galβ-4GlcNAcβ-6   │   Galβ-4GlcNAcβ-3Galβ-4Glc-DH  │   Galβ-4GlcNAcβ-3 |
| GSC-915-AO | Fucα-2Galβ-4GlcNAcβ-6   │   Galβ-4GlcNAcβ-3Galβ-4Glc-AO  │   Galβ-4GlcNAcβ-3 |
| H3 (with H3-Fuc)* | Fucα-2Galβ-4GlcNAcβ-6   │   Galβ-4GlcNAcβ-3Galβ-4Glc-Cer  │  Fucα-2Galβ-4GlcNAcβ-3 |
| A-Tri | GalNAcα-3Gal-DH  │  Fucα-2 |
| A-Hexa-T1 | GalNAcα-3Galβ-3GlcNAcβ-3Galβ-4Glc-DH  │  Fucα-2 |
| A-Hexa-T2 | GalNAcα-3Galβ-4GlcNAcβ-3Galβ-4Glc-DH  │  Fucα-2 |
| A-Hepta | Fucα-4  │ GalNAcα-3Galβ-3GlcNAcβ-3Galβ-4Glc-DH  │  Fucα-2 |
| Ab (with Ab+Fuc)* | GalNAcα-3Galβ-4GlcNAcβ-3Galβ-4GlcNAcβ-3Galβ-4Glcβ-Cer  │  Fucα-2 |
| Ad (with Ad+Fuc)* | GalNAcα-3Galβ-4GlcNAcβ-6  │ │  Fucα-2 Galβ-4GlcNAcβ-3Galβ-4Glcβ-Cer  │ GalNAcα-3Galβ-4GlcNAcβ-3Galβ-4GlcNAcβ-3  │   Fucα-2 |
| B-Tri | Galα-3Gal-DH  │  Fucα-2 |
| B-Hexa-T1 | Galα-3Galβ-3GlcNAcβ-3Galβ-4Glc-DH  │  Fucα-2 |
| B-Hexa-T2 | Galα-3Galβ-4GlcNAcβ-3Galβ-4Glc-DH  │  Fucα-2 |
| B-penta-AO | Galα-3Galβ-4Glc-AO  │ │  Fucα-2 │  Fucα-3 |
| B-III dodecaosylceramide | Galα-3Galβ-4GlcNAcβ-6  │ │  Fucα-2 Galβ-4GlcNAcβ-3Galβ-4Glcβ-Cer  │ Galα-3Galβ-4GlcNAcβ-3  │  Fucα-2 |
| B-IV tetradecaosylceramide | Galα-3Galβ-4GlcNAcβ-6  │ │  Fucα-2 Galβ-4GlcNAcβ-3Galβ-4Glcβ-Cer  │ Galα-3Galβ-4GlcNAcβ-3Galβ-4GlcNAcβ-3  │  Fucα-2 |
| A2(2-6) | NeuAcα-6Galβ-4GlcNAcβ-2Manα-6  │  Manβ-4GlcNAcβ-4GlcNAc-DH  │ NeuAcα-6Galβ-4GlcNAcβ-2Manα-3 |
| A2F(2-3) | NeuAcα-3Galβ-4GlcNAcβ-2Manα-6 Fucα-6  │ │  Manβ-4GlcNAcβ-4GlcNAc-DH  │ NeuAcα-3Galβ-4GlcNAcβ-2Manα-3 |
| Lam-6-AO* | Glcβ-3Glcβ-3Glcβ-3Glcβ-3Glcβ-3Glc-AO |
| Curd-8-AO* | Glcβ-3Glcβ-3Glcβ-3Glcβ-3Glcβ-3Glcβ-3Glcβ-3Glc-AO |
| Pust-6-AO | Glcβ-6Glcβ-6Glcβ-6Glcβ-6Glcβ-6Glc-AO |
| **BGG Set 1** | |
| Galα-4Galβ-4GlcNAc | Galα-4Galβ-4GlcNAc-DH |
| Ceramide trihexoside | Galα-4Galβ-4Glcβ-Cer |
| Gal4 | Galα-3Galβ-4Galα-3Gal-DH |
| Globoside (P-antigen) | GalNAcβ-3Galα-4Galβ-4Glcβ-Cer |
| Forssmann glycolipid | GalNAcα-3GalNAcβ-3Galα-4Galβ-4Glcβ-Cer |
| Lac-AO | Galβ-4Glc-AO |
| Galα-6Glc-AO | Galα-6Glc-AO |
| Galβ-6GalNAc-AO | Galβ-6GalNAc-AO |
| Globo-H-Hexa | Fucα-2Galβ-3GalNAcβ-3Galα-4Galβ-4GlcNAc-DH |
| Globo-A-Hepta | GalNAcα-3Galβ-3GalNAcβ-3Galα-4Galβ-4GlcNAc-DH  │  Fucα-2 |
| Globo-B-Hepta | Galα-3Galβ-3GalNAcβ-3Galα-4Galβ-4GlcNAc-DH  │  Fucα-2 |
| Gal2GlcNAc(1-3)-AO | Galα-3Galβ-3GlcNAc-AO |
| GOS-DP2-AO | Galβ-4Glc-AO |
| GOS-DP4-AO | Galβ-4Galβ-4Galβ-4Glc-AO |
| Bovine submaxillary mucin |  |
| Orsay-1-AO | Galβ-4GlcNAcβ-6Gal-AO |
| Orsay-2-AO | Galβ-4GlcNAcβ-3Gal-AO |
| Orsay-3-AO | Galβ-3GlcNAcβ-6Gal-AO |
| Orsay-4-AO | Galβ-3GlcNAcβ-3Gal-AO |
| GalNAcα-3Galβ-4Glc | GalNAcα-3Galβ-4Glc-DH |
| LNT | Galβ-3GlcNAcβ-3Galβ-4Glc-DH |
| LNnT | Galβ-4GlcNAcβ-3Galβ-4Glc-DH |
| B-like pentaosylceramide | Galα-3Galβ-4GlcNAcβ-3Galβ-4Glcβ-Cer |
| Klaus glycolipid | Galβ-3Galβ-4GlcNAcβ-3Galβ-4Glcβ-Cer |
| LSTa | NeuAcα-3Galβ-3GlcNAcβ-3Galβ-4Glc-DH |
| LSTc | NeuAcα-6Galβ-4GlcNAcβ-3Galβ-4Glc-DH |
| pLNH | Galβ-3GlcNAcβ-3Galβ-4GlcNAcβ-3Galβ-4Glc-DH |
| pLNnH | Galβ-4GlcNAcβ-3Galβ-4GlcNAcβ-3Galβ-4Glc-DH |
| LNnO | Galβ-4GlcNAcβ-3Galβ-4GlcNAcβ-3Galβ-4GlcNAcβ-3Galβ-4Glc-DH |
| Lam-4-AO | Glcβ-3Glcβ-3Glcβ-3Glc-AO |
| Pust-4-AO | Glcβ-6Glcβ-6Glcβ-6Glc-AO |
| I-octaosylceramide | Galβ-4GlcNAcβ-6  │  Galβ-4GlcNAcβ-3Galβ-4Glcβ-Cer  │ Galβ-4GlcNAcβ-3 |
| B-like decaosylceramide | Galα-3Galβ-4GlcNAcβ-6  │  Galβ-4GlcNAcβ-3Galβ-4Glcβ-Cer  │ Galα-3Galβ-4GlcNAcβ-3 |
| LNFP-II | Galβ-3GlcNAcβ-3Galβ-4Glc-DH  │  Fucα-4 |
| LNDFH-I | Fucα-2Galβ-3GlcNAcβ-3Galβ-4Glc-DH  │  Fucα-4 |
| LNFP-III | Galβ-4GlcNAcβ-3Galβ-4Glc-DH  │  Fucα-3 |
| LNnDFH-I | Fucα-2Galβ-4GlcNAcβ-3Galβ-4Glc-DH  │  Fucα-3 |
| TFpLNH-I | Fucα-2Galβ-3GlcNAcβ-3Galβ-4GlcNAcβ-3Galβ-4Glc-DH  │ │  Fucα-4 Fucα-3 |
| LNFP-I | Fucα-2Galβ-3GlcNAcβ-3Galβ-4Glc-DH |
| LNnFP-I | Fucα-2Galβ-4GlcNAcβ-3Galβ-4Glc-DH |
| A-Hexa-T1 | GalNAcα-3Galβ-3GlcNAcβ-3Galβ-4Glc-DH  │  Fucα-2 |
| A-Hexa-T2 | GalNAcα-3Galβ-4GlcNAcβ-3Galβ-4Glc-DH  │  Fucα-2 |
| B-Hexa-T1 | Galα-3Galβ-3GlcNAcβ-3Galβ-4Glc-DH  │  Fucα-2 |
| B-Hexa-T2 | Galα-3Galβ-4GlcNAcβ-3Galβ-4Glc-DH  │  Fucα-2 |
| B-penta-AO | Galα-3Galβ-4Glc-AO  │ │  Fucα-2 │  Fucα-3 |
| B-III dodecaosylceramide | Galα-3Galβ-4GlcNAcβ-6  │ │  Fucα-2 Galβ-4GlcNAcβ-3Galβ-4Glcβ-Cer  │ Galα-3Galβ-4GlcNAcβ-3  │  Fucα-2 |

**Abbreviations**: *, predominant component of the oligosaccharide probe; AO, aminooxy; Cer, ceramide moiety; DH, 1,2-dihexadecyl-sn-glycero-3-phosphoethanolamine; Fuc, fucose; Gal, galactose; GalNAc, Nacetylgalactosmine; Glc, glucose; GlcNAc, N-acetylglucosamine; NeuAc, N-acetyl neuraminic acid; NeuGc, N-glycolyl Neuraminic acid; Man, Mannose;
